# Supplementary material for: Thermal layer-by-layer preparation of oriented films of a Cu(i) ionic inorganic–organic hybrid material showing semiconducting and SHG properties
Source: Royal Society of Chemistry journal article supplement (doi:10.1039/c6tc02388f), 2016-01-01
Supplement: c6tc02388f1.pdf [file c6tc02388f1.pdf]

## SUPPORTING INFORMATION

### Thermal layer-by-layer preparation of oriented films of a Cu(I) ionic inorganic-organic hybrid material showing semiconducting and SHG properties

Daniele Marinotto,<sup>\*,a,b</sup> Silvia Giulia Danelli,<sup>b</sup> Anna Giaretta,<sup>b</sup> Elena Lucenti,<sup>a</sup> Philipp Stadler,<sup>\*,c</sup> Elisa Tordin,<sup>c</sup> Giovanni Mattei,<sup>c</sup> Guido Scavia,<sup>d</sup> Renato Ugo,<sup>b</sup> and Elena Cariati<sup>\*,b</sup>

<sup>a</sup>Istituto di Scienze e Tecnologie Molecolari del CNR (ISTM-CNR), via Golgi 19, 20133 Milano, Italy and UdR di Milano dell'INSTM.

<sup>b</sup>Dipartimento di Chimica and Centro di Eccellenza CIMAINA dell'Università degli Studi di Milano, UdR dell'INSTM, 20133 Milano, Italy

<sup>c</sup>Institute for Organic Solar Cells (LIOS) and Institute of Physical Chemistry, Johannes Kepler University Linz, Altenbergerstr. 69, 4040 Linz, Austria

<sup>d</sup>Dipartimento di Fisica e Astronomia "Galileo Galilei" dell'Università degli Studi di Padova, via Marzolo 8, 35131 Padova, Italy

<sup>e</sup>Istituto per lo Studio delle Macromolecole (ISMAL), CNR, Via Bassini 15, 20133 Milano, Italy.

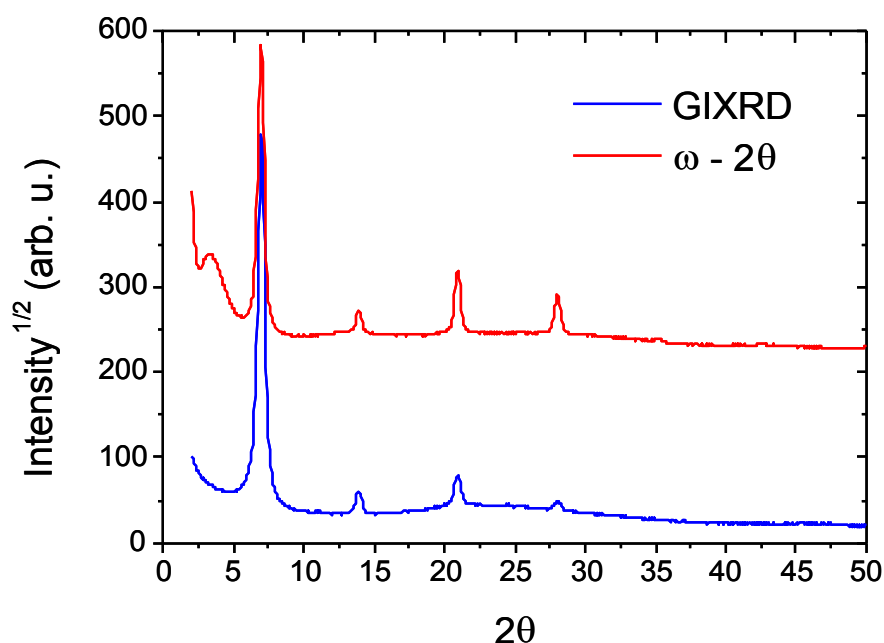

**Figure S1.** GIXRD diffraction pattern of CuI/[DAMS]I (5 cycles on glass substrate).

**A**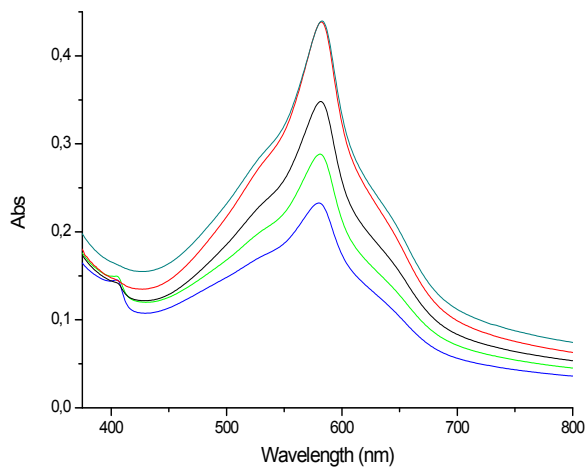**B**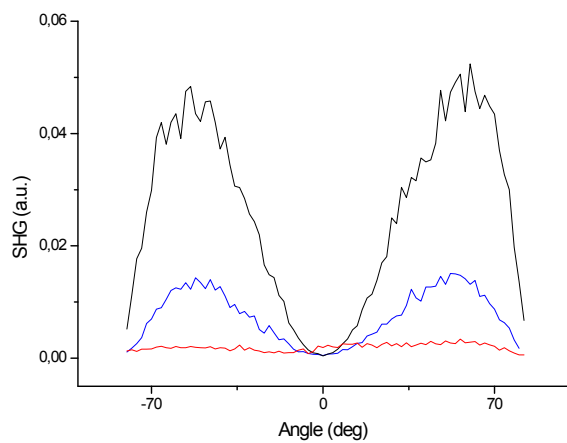

**Figure S2.** Crystalline film of **1** obtained by deposition of one CuI layer on a glass substrate followed by various [DAMS]I deposition/annealing cycles: A) electronic absorption spectra after: 1 cycle (blue), 2 cycles (green), 3 cycles (black), 4 cycles (red) and 5 cycles (cyan). B) pp Maker fringes after: 1 cycle (blue), 4 cycles (black) and 5 cycles (red).

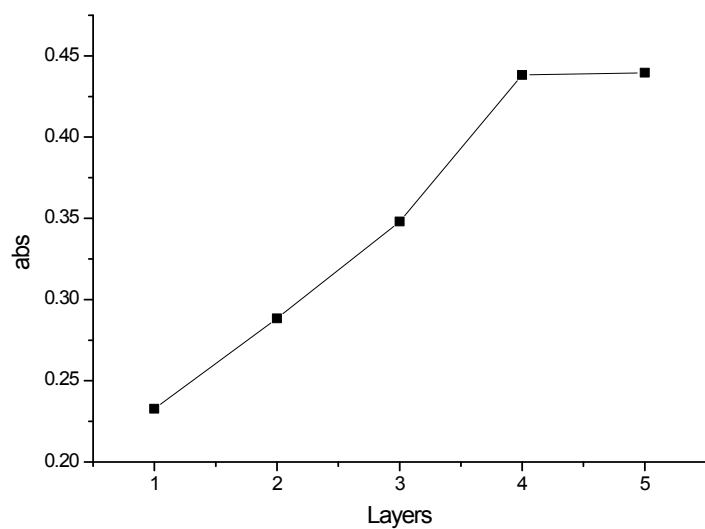

**Figure S3.** Maximum absorption intensity at 580 nm vs. number of cycles on glass substrate.
